# Supplementary material for: Inhibition of the miR-192/215–Rab11-FIP2 axis suppresses human gastric cancer progression
Source: PubMed Central journal article supplement (PMC6045576; doi:10.1038/s41419-018-0785-5), 2018-07-13
Supplement: 41419_2018_785_MOESM2_ESM.pdf [file 41419_2018_785_MOESM2_ESM.pdf]

**Supplementary Table 1. Rab11-FIP2 Primers and siRNA Sequences**

---

|                            | <b>Sequences of QPCR</b>      |
|----------------------------|-------------------------------|
| Rab11-FIP2F                | 5'CGGACAGCAACCCCTTTGA3'       |
| Rab11-FIP2R                | 5' GCGTTTCTTCCATTACCCTTAC3'   |
| <b>Sequences of siRNAs</b> |                               |
| Rab11-FIP2-siRNA1-F        | 5'CCGCAAGUAUGUUUGACUU DTDT 3' |
| Rab11-FIP2-siRNA1-R        | 3'DTDT GGCGUUCAUACAAACUGAA 5' |
| Rab11-FIP2-siRNA2-F        | 5'GCUACCUGGAUUGCUAAUU DTDT 3' |
| Rab11-FIP2-siRNA2-R        | 3'DTDT CGAUGGACCUAACGAUUAA 5' |
| Rab11-FIP2-siRNA3-F        | 5'GGAUGCAGUGAUUAAGGAA DTDT 3' |
| Rab11-FIP2-siRNA3-R        | 3'DTDT CCUACGUCACUAAUCCUU 5'  |

---

**Supplementary Table 2. Relationship between Rab11-FIP2 expression levels and clinicopathologic features in GC patients**

| Features            | Total number | High expression | Low expression | $\lambda^2$ | <i>P</i> |
|---------------------|--------------|-----------------|----------------|-------------|----------|
| FIP2                | 40           | 2               | 38             |             |          |
| Age                 |              |                 |                | 0.005       | 0.942    |
| <60                 | 19           | 1               | 18             |             |          |
| ≥60                 | 21           | 1               | 20             |             |          |
| Gender              |              |                 |                | 0.535       | 0.465    |
| Male                | 29           | 1               | 28             |             |          |
| Female              | 11           | 1               | 10             |             |          |
| Tumor size          |              |                 |                | 0.799       | 0.372    |
| <5cm                | 11           | 0               | 11             |             |          |
| ≥5cm                | 29           | 2               | 27             |             |          |
| Differentiation     |              |                 |                | 0.234       | 0.89     |
| Well                | 2            | 0               | 2              |             |          |
| Moderate            | 2            | 0               | 2              |             |          |
| Poor                | 36           | 2               | 34             |             |          |
| Lymphoma metastasis |              |                 |                | 2.167       | 0.141    |
| N                   | 11           | 0               | 11             |             |          |
| Y                   | 29           | 5               | 24             |             |          |

**Supplementary Table 3. Target Genes Screened by Microarray**

| Fold change and Regulation |                               |            |                               |            | Annotation       |                  |
|----------------------------|-------------------------------|------------|-------------------------------|------------|------------------|------------------|
| Cells                      | Fold change ([192i] vs [NSC]) | Regulation | Fold change ([215i] vs [NSC]) | Regulation | Genbank          | GeneSymbol       |
| BGC823                     | 2.50                          | up         | 2.32                          | up         | NM_078628        | MSL3             |
| BGC823                     | 4.52                          | up         | 2.00                          | up         | NM_007076        | FICD             |
| BGC823                     | 2.86                          | up         | 3.21                          | up         | NM_014567        | BCAR1            |
| BGC823                     | <b>3.55</b>                   | <b>up</b>  | <b>3.5</b>                    | <b>up</b>  | <b>NM_014904</b> | <b>RAB11FIP2</b> |
| BGC823                     | 3.94                          | up         | 2.13                          | up         | NM_174942        | GAS2L3           |
| BGC823                     | 3.18                          | up         | 2.77                          | up         | NM_001402        | EEF1A1           |
| BGC823                     | 1.92                          | up         | 1.87                          | up         | NM_014795        | ZEB2             |
| BGC823                     | 2.31                          | up         | 2.10                          | up         | NR_002822        | MGC72080         |
| BGC823                     | 2.37                          | up         | 2.35                          | up         | NR_027046        | LOC145474        |
| BGC823                     | 3.48                          | up         | 3.18                          | up         | NM_003618        | MAP4K3           |

  

| Cells  | [192m] vs [NSC] |             | [215m] vs [NSC] |             |                  |                  |
|--------|-----------------|-------------|-----------------|-------------|------------------|------------------|
| HFE145 | 2.44            | down        | 2.41            | down        | NM_001134462     | NOTO             |
| HFE145 | 2.02            | down        | 3.23            | down        | NM_016395        | PTPLAD1          |
| HFE145 | 3.32            | down        | 2.10            | down        | NM_001702        | BAI1             |
| HFE145 | 3.50            | down        | 2.21            | down        | NM_015035        | ZHX3             |
| HFE145 | <b>3.08</b>     | <b>down</b> | <b>5.07</b>     | <b>down</b> | <b>NM_014904</b> | <b>RAB11FIP2</b> |
| HFE145 | 2.24            | down        | 3.51            | down        | NM_032172        | USP42            |
| HFE145 | 2.12            | down        | 1.95            | down        | NM_014795        | ZEB2             |
| HFE145 | 3.55            | down        | 4.93            | down        | NM_174942        | GAS2L3           |
| HFE145 | 2.79            | down        | 7.78            | down        | NR_027330        | C7orf54          |
| HFE145 | 2.59            | down        | 2.74            | down        | NM_001042402     | NAAA             |

Abbreviations: 192:miR-192;215:miR-215;*i*:inhibitor;*m*:mimic;*NSC*:non-specific control
